# Supplementary material
Source: publisher site journal article supplement (https://www.dovepress.com/article/421695)
Supplement: Supplementary file 1 [file get_supplementary_file.php]

Supplementary table 1: COREQ checklist

| No. Item                                      | Guide questions/description                                           | Reported on Page #                |
|-----------------------------------------------|-----------------------------------------------------------------------|-----------------------------------|
| Domain 1: Research team and reflexivity       |                                                                       |                                   |
| 1. Interviewer/facilitator                    | Which author/s conducted the interview?                               | 3                                 |
| 2. Credentials                                | What were the researcher's credentials?                               | 1                                 |
| 3. Occupation                                 | What was their occupation at the time of the study?                   | 3                                 |
| 4. Gender                                     | Was the researcher male or female?                                    | 3                                 |
| 5. Experience and training                    | What experience or training did the researcher have?                  | 3                                 |
| 6. Relationship with participants established | Was a relationship established prior to study commencement?           | 3                                 |
| 7. Participant knowledge of the interviewer   | What did the participants know about the researcher?                  | 3                                 |
| 8. Interviewer characteristics                | What characteristics were reported about the interviewer/facilitator? | NA                                |
| Domain 2: study design                        |                                                                       |                                   |
| 9. Methodological orientation and Theory      | What methodological orientation was stated to underpin the study?     | NA                                |
| 10. Sampling                                  | How were participants selected?                                       | 4                                 |
| 11. Method of approach                        | How were participants approached?                                     | 4                                 |
| 12. Sample size                               | How many participants were in the study?                              | 6                                 |
| 13. Non-participation                         | How many people refused to participate or dropped out? Reasons?       | 6;10                              |
| 14. Setting of data collection                | Where was the data collected?                                         | 4                                 |
| 15. Presence of non-participants              | Was anyone else present besides the participants and researchers?     | 6                                 |
| 16. Description of sample                     | What are the important characteristics of the sample?                 | 6                                 |
| 17. Interview guide                           | Were questions, prompts, guides provided by the authors?              | 3 and supplementary files 2 and 3 |
| 18. Repeat interviews                         | Were repeat interviews carried out?                                   | 3                                 |
| 19. Audio/visual recording                    | Did the research use audio or visual recording to collect the data?   | 3                                 |
| 20. Field notes                               | Were field notes made during and/or after the interview?              | 3                                 |

|                                    |                                                                                                         |      |
|------------------------------------|---------------------------------------------------------------------------------------------------------|------|
| 21. Duration                       | What was the duration of the interviews                                                                 | 6    |
| 22. Data saturation                | Was data saturation discussed?                                                                          | 3; 6 |
| 23. Transcripts returned           | Were transcripts returned to participants for comment and/or correction?                                | NA   |
| Domain 3: analysis and findings    |                                                                                                         |      |
| 24. Number of data coders          | How many data coders coded the data?                                                                    | 6    |
| 25. Description of the coding tree | Did authors provide a description of the coding tree?                                                   | 6    |
| 26. Derivation of themes           | Were themes identified in advance or derived from the data?                                             | 6    |
| 27. Software                       | What software, if applicable, was used to manage the data?                                              | 6    |
| 28. Participant checking           | Did participants provide feedback on the findings?                                                      | NA   |
| 29. Quotations presented           | Were participant quotations presented to illustrate the themes/findings? Was each quotation identified? | NA   |
| 30. Data and findings consistent   | Was there consistency between the data presented and the findings?                                      | 6-11 |
| 31. Clarity of major themes        | Were major themes clearly presented in the findings?                                                    | 6-11 |
| 32. Clarity of minor themes        | Is there a description of diverse cases or discussion of minor themes?                                  | 6-11 |

## Entretien semi-directif patientes

### Adaptation Picture Option Grid – chirurgie mammaire OU reconstruction

*Bonjour, je m'appelle Marie-Anne Durand, je suis chercheuse à l'Institut Paoli-Calmettes, dans le groupe Cancers, Biomédecine et société. Je travaille avec le Dr. Bannier sur ce projet.*

*Merci d'avoir accepté de me rencontrer et de participer à cette étude. Comme vous l'avez sans doute lu dans notre lettre d'information, cette étude a pour but d'adapter des outils d'aide à la décision (créés en anglais) pour le traitement du cancer du sein au stade précoce. Ces outils (que vous voyez ici) peuvent améliorer l'information, la prise de décision et la satisfaction de patientes qui présentent les mêmes problèmes de santé que les vôtres.*

*Avez-vous eu le temps de lire la lettre d'information ?*

#### **SI LA REPONSE EST NON, RESUMER BRIEVEMENT**

*Est-ce que vous avez des questions avant que l'on débute l'entretien ?*

*Je vais prendre des notes afin de pouvoir ensuite analyser ce que m'avez dit et améliorer le contenu de la brochure.*

*Je vous rappelle que cet entretien est confidentiel. Tout ce que vous me dites est strictement destinées aux chercheurs responsables de ce projet. L'analyse sera anonyme.*

#### **DISTRIBUER LE PREMIER OUTIL D'AIDE A LA DECISION : CHIRURGIE MAMMAIRE**

#### **-----ENTRETIEN COMMENCE-----**

Nous appelons ces brochures des outils d'aide à la décision. Nous les utilisons pendant la consultation d'annonce, ou après, lorsque l'on parle de reconstruction. Ces brochures s'utilisent beaucoup aux États-Unis et en Grande Bretagne, pour aider les patientes à choisir entre plusieurs options de traitement ou de reconstruction pour leur cancer du sein. Même si vous n'étiez pas dans ce cas de figure là et n'avez pas eu le choix du traitement (pour la chirurgie mammaire ou la reconstruction), j'aimerais avoir votre avis en ce qui concerne le contenu et l'apparence des brochures.

Nous souhaitons les introduire en France. Pour cela, il faut s'assurer que le contenu est compréhensible et acceptable auprès des patientes françaises. Souhaitez-vous prendre quelques minutes pour regarder le contenu de la brochure ou préférez-vous que nous le regardions ensemble ? N'hésitez pas à l'annoter.

**SI PREFERE REGARDER SEULE, S'ABSENTER PENDANT 3-4 MINUTES**

**1) Quelles sont vos impressions générales ?**

-----AU MOINS 5 SECONDES DE SILENCE-----

- 1a. Qu'est-ce que vous pensez du texte ?
- 1b. Est-ce que certaines choses sont difficiles à comprendre ? Lesquelles ?
- 1c. Est-ce que certains mots vous paraissent trop compliqués ? Lesquels ?
- 1d. Pensez-vous que ce type de brochure est accessible à tous ?
- 1e. La traduction directe de l'anglais pour ce type de brochure est outil d'aide à la décision. Auriez-vous des suggestions pour un autre nom, qui serait peut-être plus intuitif en français ?

**2) Que pensez-vous des questions (MONTRER QUESTIONS 1 A 9) ? Ces questions sont censées couvrir toutes les questions qu'une patiente se pose par rapport au traitement du cancer du sein au stade précoce.**

- 2a. Est-ce que certaines questions vous paraissent mal formulées ? lesquelles ?
- 2b. **SI OUI** – avez-vous des suggestions pour améliorer la formulation ?
- 2c. Faut-il supprimer certaines questions ? Lesquelles ? Pourquoi ?
- 2d. A-t-on oublié des questions importantes ? Lesquelles ?
- 2e. Est-ce que l'ordre de présentation des questions (du plus important au moins important) vous paraît approprié ?
- 2f. Avez-vous des suggestions pour améliorer les questions ? (SI NECESSAIRE)

**3) Que pensez-vous des images ?**

- 3a. Est-ce certaines images vous déplaisent ?
- 3b. Que pensez-vous des personnages ?
- 3c. Que pensez-vous des images représentant la poitrine pour les questions 3, 4 et 7 ?
- 3d. Est-ce que certaines images sont difficiles à interpréter ? Lesquelles ?
- 3e. Que pensez-vous des couleurs ?
- 3f. Avez-vous des suggestions pour améliorer les images ?

**4) J'aimerais maintenant attirer votre attention vers les questions 2 et 4**

- 4a) Pouvez-vous me dire ce que vous comprenez en regardant ce diagramme (REPONSE POUR CHAQUE PICTOGRAMME) ?
- 4b) Est-ce que ce type de diagramme vous paraît utile ? pourquoi ?
- 4c) préféreriez-vous un autre type de diagramme ? (MONTRER DIAGRAMME A BARRES)
- 4d) Avez-vous des suggestions pour améliorer les diagrammes ?

**5) Que pensez-vous de la dernière page (notes et questions) ?**



5a. Que peut-on améliorer sur cette page ?

**6) Auriez-vous souhaité recevoir ce type de brochure lors de la consultation d'annonce ?**

**7) Avez-vous d'autres commentaires ou suggestions qui permettraient d'améliorer la brochure ?**

**English translation (single translation by the authors for reviewing purposes only)**

**Semi-directive interview with healthcare providers  
Adaptation Picture Option Grid - breast surgery and reconstruction**

*Hello, my name is Marie-Anne Durand, I'm a researcher at the Institut Paoli-Calmettes, in the Cancers, Biomedicine and Society group. I work with Drs. Bannier and Mancini on this project.*

*Thank you for agreeing to meet me and to take part in this study. As you may have read in our information sheet, the aim of this study is to adapt decision-support tools (created in English) for the treatment of early-stage breast cancer. These tools (which you can see here) can improve the information, decision-making and satisfaction of patients with the same health problems as yours.*

*Have you had time to read the information sheet?*

**IF NO, SUMMARIZE BRIEFLY**

*Do you have any questions before we start?*

*I'm going to take notes so that I can analyze what you've told me and improve the content of the brochure.*

*I would like to remind you that this interview is confidential. Everything you tell me is strictly for the researchers in charge of this project. The analysis will be anonymous.*

**DISTRIBUTING THE FIRST DECISION AID: BREAST SURGERY**

----- INTERVIEW STARTS-----

We call these brochures decision aids. We use them during the initial consultation, or afterwards, when we talk about reconstruction. These brochures are widely used in the United States and Great Britain, to help patients choose between several treatment or reconstruction options for their breast cancer. Even if you weren't in this situation and didn't have the choice of treatment (for breast surgery or reconstruction), I'd like to have your opinion on the content and appearance of the brochures.

We would like to introduce them in France. To do this, we need to make sure that the content is understandable and acceptable to French patients. Would you like to take a few minutes to look at the contents of the brochure, or would you prefer us to look at it together? Please feel free to mark up the brochure.

IF THE PATIENT PREFERS TO WATCH ALONE, LEAVE FOR 3-4 MINUTES

**1) What are your general impressions?**

-----AT LEAST 5 SECONDS OF SILENCE-----

1a. What do you think of the text?

1b. Are there any things that are difficult to understand? Which ones?

1c. Do any words seem too complicated? Which ones?

1d. Do you think this type of brochure is accessible to everyone?

1e. Do you have any suggestions for a different name, one that might be more intuitive in French?

**2) What do you think of the questions (SHOW QUESTIONS 1 TO 9)? These questions are intended to cover all the questions a patient might have about early-stage breast cancer treatment.**

2a. Do any of the questions seem badly formulated?

2b. **IF YES** - do you have any suggestions for improving the wording?

2c. Should any questions be deleted? Which ones? Why?

2d. Were any important questions omitted? Which ones?

2e. Do you think the order in which the questions are presented (from most important to least important) is appropriate?

2f. Do you have any suggestions for improving the questions (IF NECESSARY)?

**3) What do you think of the images?**

3a. Do you dislike any of the images?

3b. What do you think of the characters?

3c. What do you think of the chest images in questions 3, 4 and 7?

3d. Are any of the images difficult to interpret? Which ones?

3e. What do you think of the colors?

3f. Do you have any suggestions for improving the images?

**4) I'd now like to turn your attention to questions 2 and 4**

4a) Can you tell me what you understand by looking at this diagram (ANSWER TO PICTOGRAM)?

4b) Do you find this type of diagram useful? Why?

4c) Would you prefer another type of diagram?

4d) Do you have any suggestions for improving the diagrams?

**5) What do you think of the last page (notes and questions)?**

5a. What could be improved on this page?

**6) Would you have liked to receive this type of brochure at the time of the announcement consultation?**

**7) Do you have any other comments or suggestions for improving the brochure?**

## Entretien semi-directif soignants

### Adaptation Picture Option Grid – chirurgie mammaire et reconstruction

*Bonjour, je m'appelle Marie-Anne Durand, je suis chercheuse à l'Institut Paoli-Calmettes, dans le groupe Cancers, Biomédecine et société. Je travaille avec les Drs. Bannier et Mancini sur ce projet.*

*Merci d'avoir accepté de me rencontrer et de participer à cette étude. Comme le Dr. Bannier vous l'a sans doute expliqué, cette étude a pour but d'adapter des outils d'aide à la décision (en anglais à l'origine) pour le traitement du cancer du sein. Ces outils (que vous voyez ici) peuvent améliorer l'information, la prise de décision et la satisfaction de patientes qui présentent ce type de cancer du sein.*

Est-ce que vous avez des questions avant que l'on débute l'entretien ?

Je vais prendre des notes pendant que vous parlez afin de pouvoir ensuite analyser ce que m'avez dit. Je vous rappelle que cet entretien est confidentiel.

#### **DISTRIBUER L'OUTIL D'AIDE A LA DECISION AU CHOIX DU SOIGNANT: CHIRURGIE MAMMAIRE OU RECONSTRUCTION**

-----ENTRETIEN COMMENCE-----

Nous appelons ces brochures des outils d'aide à la décision. Ils sont généralement proposés aux patientes (et à leurs proches) pendant la consultation d'annonce, ou après, lorsque l'on parle de reconstruction. Ces brochures s'utilisent beaucoup aux États-Unis et en Grande Bretagne. Nous souhaitons les introduire en France. Pour cela, il faut que l'on s'assure que le contenu est compréhensible et acceptable pour des patientes et pour l'équipe soignante. Prenez quelques minutes pour regarder le contenu de la brochure. N'hésitez pas à l'annoter.

#### **1) Quelles sont vos impressions générales ?**

-----AU MOINS 5 SECONDES DE SILENCE-----

- 1a. Qu'est-ce que vous pensez du texte ?
- 1b. Est-ce que certaines choses sont difficiles à comprendre ? Lesquelles ?
- 1c. Est-ce que certains mots vous paraissent trop compliqués ? Lesquels ?
- 1d. Pensez-vous que ce type de brochure est accessible à tous ?
- 1e. La traduction directe de l'anglais pour ce type de brochure est outil d'aide à la décision. Auriez-vous des suggestions pour un autre nom, qui serait peut-être plus intuitif en français ?

**2) Que pensez-vous des questions (MONTRER QUESTIONS 1 A 9) ? Ces questions sont censées couvrir toutes les questions qu'une patiente se pose par rapport au traitement du cancer du sein au stade précoce.**

- 2a. Est-ce que certaines questions vous paraissent mal formulées ? Lesquelles ?
- 2b. **SI OUI** – avez-vous des suggestions pour améliorer la formulation ?
- 2c. Est-ce que les réponses aux questions et données cliniques vous paraissent appropriées ?
- 2d. Faut-il supprimer certaines questions ? Lesquelles ? Pourquoi ?
- 2e. A-t-on oublié des questions importantes ? Lesquelles ?
- 2f. Est-ce que l'ordre de présentation des questions (du plus important au moins important) vous paraît approprié ?
- 2g. Avez des suggestions pour améliorer les questions ? (SI NECESSAIRE)

**3) Que pensez-vous des images ?**

- 3a. Est-ce certaines images vous déplaisent ?
- 3b. Que pensez-vous des images représentant la poitrine pour les questions 3, 4 et 7 ?
- 3c. Est-ce que certaines images sont difficiles à interpréter ? Lesquelles ?
- 3d. Que pensez-vous des couleurs ?
- 3e. Avez-vous des suggestions pour améliorer les images ?

**4) J'aimerais maintenant attirer votre attention vers les questions 2 et 4**

- 4a) Est-ce que ce type de diagramme vous paraît utile ? pourquoi ?
- 4b) Préféreriez-vous un autre type de diagramme ? (MONTRER DIAGRAMME A BARRES)
- 4c) Avez-vous des suggestions pour améliorer les diagrammes ?

**5) Que pensez-vous de la dernière page (notes et questions) ?**

- 5a. Que peut-on améliorer sur cette page ?

**6) Souhaiteriez-vous utiliser ce type de brochure lors de la consultation d'annonce ?**

- 6a. Pourquoi ?

**7) Avez-vous d'autres commentaires ou suggestions qui permettraient d'améliorer la forme et le contenu ?**

**English translation (single translation by the authors for reviewing purposes only)**

**Semi-directive interview with healthcare providers  
Adaptation Picture Option Grid - breast surgery and reconstruction**

*Hello, my name is Marie-Anne Durand, I'm a researcher at the Institut Paoli-Calmettes, in the Cancers, Biomedicine and Society group. I work with Drs. Bannier and Mancini on this project.*

*Thank you for agreeing to meet me and to take part in this study. As Dr. Bannier no doubt explained to you, the aim of this study is to adapt decision-support tools for the treatment of breast cancer. These tools (which you can see here) can improve the information, decision-making and satisfaction of patients with this type of breast cancer.*

*Do you have any questions before we start?*

*I'm going to take notes while you're talking, so that I can analyze what you've told me. I remind you that this interview is confidential.*

DISTRIBUTING THE DECISION AID: BREAST SURGERY OR RECONSTRUCTION (healthcare provider choice)

-----INTERVIEW STARTS-----

We call these brochures decision aids. They are generally offered to patients (and their families) during the consultation, or afterwards, when reconstruction is discussed. These brochures are widely used in the United States and Great Britain, and we would like to introduce them in France. To do this, we need to make sure that the content is understandable and acceptable to patients and their care teams. Please take a few minutes to look at the contents of the brochure. Feel free to annotate it.

**1) What are your general impressions?**

-----AT LEAST 5 SECONDS SILENCE-----

- 1a. What do you think of the text?
- 1b. Are there any things that are difficult to understand? Which ones?
- 1c. Do any words seem too complicated? Which ones?
- 1d. Do you think this type of brochure is accessible to everyone?
- 1e. Do you have any suggestions for a different name, one that might be more intuitive in French?

**2) What do you think of the questions (SHOW QUESTIONS 1 TO 9)? These questions are intended to cover all the questions a patient might have about early-stage breast cancer treatment.**

- 2a. Do any of the questions seem badly formulated? Which ones?
- 2b. **IF YES** - do you have any suggestions for improving the wording?
- 2c. Do the answers to the questions and clinical data seem appropriate to you?
- 2d. Should any questions be deleted? Which ones? Why or why not?
- 2e. Were any important questions omitted? Which ones?
- 2f. Do you think the order in which the questions are presented (from most important to least important) is appropriate?
- 2g. Do you have any suggestions for improving the questions (IF NECESSARY)?

**3) What do you think of the images?**

- 3a. Do you dislike any of the images?
- 3b. What do you think of the chest images in questions 3, 4 and 7?
- 3c. Are any of the images difficult to interpret? Which ones?
- 3d. What do you think of the colors?
- 3e. Do you have any suggestions for improving the images?

**4) I'd now like to turn your attention to questions 2 and 4**

- 4a) Do you find this type of diagram useful? Why?
- 4b) Would you prefer another type of diagram?
- 4c) Do you have any suggestions for improving the diagrams?

**5) What do you think of the last page (notes and questions)?**

- 5a. What could be improved on this page?

**6) Would you like to use this type of brochure for your announcement consultation?**

- 6a. Why or why not?

**7) Do you have any other comments or suggestions for improving the form and content?**

Supplementary figure 3: Anonymous online survey (sent to each participating surgeon after each PDSA cycle)

## Pouvez-vous s'il vous plait confirmer combien d'exemplaire de chaque outil vous

Merci de répondre aux 8 questions ci-dessous concernant l'utilisation du ou des outils d'aide à la décision au cours des quatre dernières semaines.

1. Pouvez-vous s'il vous plait indiquer combien d'exemplaires de chaque outil vous avez utilisé avec vos patientes durant les quatre dernières semaines ?

Outil pour la chirurgie mammaire

Outil pour la reconstruction

2. Quelles difficultés liées à l'utilisation de l'outil avez-vous rencontré ?

- Utiliser l'outil prend plus de temps que ma consultation habituelle
- Le choix entre les options proposées n'est pas toujours possible
- L'outil ne s'intègre pas bien dans la consultation. Il devrait être présenté aux patientes avant ou après ma consultation
- Certaines données censées être validées scientifiquement me paraissent incorrectes



- Le contenu doit être amélioré
- L'outil n'est pas suffisamment flexible d'utilisation
- Autres difficultés :
- Aucune difficulté majeure

**3. Sur une échelle de 0 à 10, merci d'indiquer l'utilité de ce type d'outil pendant les consultations :**

Pas utile du tout Extrêmement utile

0 1 2 3 4 5 6 7 8 9 10

**4. Pourriez-vous décrire comment l'utilisation de l'outil a été accueilli par vos patientes ?**

- Refus d'utilisation
- Accueil mitigé
- Accueil positif
- Accueil extrêmement positif
- Autre :

**5. Est-il nécessaire d'apporter des modifications au contenu de l'outil ?**

Oui. Merci de préciser lesquelles :

Non

**6. Auriez-vous souhaité recevoir plus d'information concernant l'utilisation de l'outil (par exemple, lien vidéo ou formation sur la décision partagée et l'utilisation de ce type d'outil) ?**

Oui

Non

Autre réponse :

**7. Sur une échelle de 0 à 10, merci d'indiquer si vous avez l'intention de continuer à utiliser le ou les outils disponibles dans le futur ?**

Absolument pas

Absolument

0 1 2 3 4 5 6 7 8 9 10

**8. Avez-vous d'autres remarques concernant l'utilisation du ou des outils disponibles ?**

Powered by Qualtrics

*English translation (single translation by the authors for reviewing purposes only)*

Please answer the 8 questions below about your use of the decision support tool(s) over the past four weeks.

**1. Can you please indicate how many copies of each tool you have used with your patients in the last four weeks?**

Breast surgery decision aid: \_\_\_\_\_

Reconstruction decision aid: \_\_\_\_\_

**2. What difficulties have you encountered in using the tool?**

- Using the tool takes more time than my usual consultation
- It's not always possible to choose between the options offered.
- The tool does not fit well into the consultation. It should be presented to patients before or after my consultation
- Some data supposed to be scientifically validated seem incorrect to me
- Content needs improvement
- The tool is not flexible enough to use
- Other difficulties: \_\_\_\_\_
- No major difficulties

**3. On a scale from 0 to 10, please indicate the usefulness of this type of tool during consultations:**

Not at all useful Extremely useful  
0    1    2    3    4    5    6    7    8    9    10

**4. Could you describe how the use of the tool was received by your patients?**

- Refusal to use
- Mixed reception
- Positive reception
- Extremely positive reception
- Other: \_\_\_\_\_

**5. Are any changes needed to the content of the tool?**

- Yes, please specify: \_\_\_\_\_
- No

**6. Would you have liked to receive more information on how to use the tool (e.g. video link or training on shared decision making and the use of this type of tool)?**

- Yes
- No
- Other answer: \_\_\_\_\_

**7. On a scale from 0 to 10, please indicate whether you intend to continue using the tool(s) available in the future?**

Absolutely not

0   1   2   3   4   5   6   7   8   9   10

Absolutely

**8. Do you have any other comments regarding the use of the available tool(s)?**

---

---

---

---

---

# Cancer du sein à un stade précoce : Quel est le bon choix pour moi ?

Utilisez cet outil d'aide à la décision pour vous aider à choisir, avec votre médecin, la meilleure option de traitement pour le cancer du sein à un stade précoce (stades I à IIIA).

## 1. Est-ce que ma durée de vie sera changée ?

Tumorectomie\* avec radiothérapie\*

Mastectomie\*

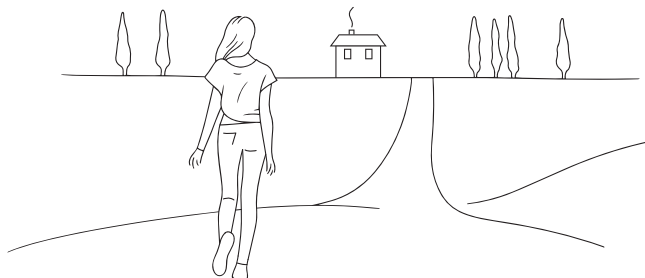

Non, votre durée de vie reste la même quelle que soit l'opération.

Vos questions et ressenti : .....

## 2. Est-ce que le cancer peut revenir dans le sein ?

Tumorectomie avec radiothérapie

Mastectomie

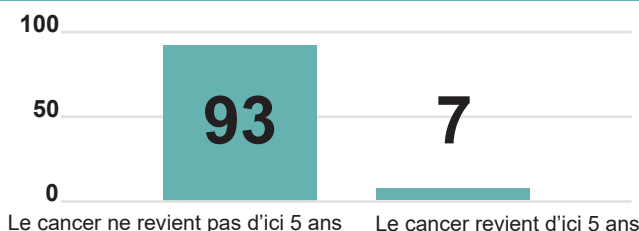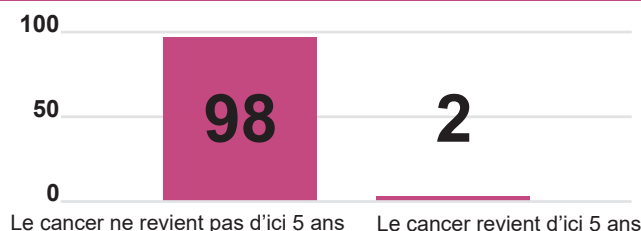

Sur une période de 5 ans, le cancer revient chez environ 7 femmes sur 100 (7%). Le risque peut être plus ou moins élevé selon le stade du cancer et les caractéristiques tumorales.

Sur une période de 5 ans, le cancer revient chez environ 2 femmes sur 100 (2%). Le risque peut être plus ou moins élevé selon le stade du cancer et les caractéristiques tumorales.

\***Tumorectomie** : Opération pendant laquelle le chirurgien enlève la tumeur tout en conservant le sein. On utilise également les mots zonectomie et mastectomie partielle pour parler de la même opération.

\***Mastectomie** : Opération pendant laquelle le chirurgien enlève le sein. On utilise également les mots mastectomie totale pour parler de la même opération.

\***Radiothérapie** : Traitement postopératoire pendant lequel le médecin applique des rayons sur une partie ou sur tout le sein.

# Cancer du sein à un stade précoce : Quel est le bon choix pour moi ?

Utilisez cet outil d'aide à la décision pour vous aider à choisir, avec votre médecin, la meilleure option de traitement pour le cancer du sein à un stade précoce (stades I à IIIA).

## 3. Qu'est-ce qui est retiré du sein ?

| Tumorectomie avec radiothérapie                                                   | Mastectomie                                                                         |
|-----------------------------------------------------------------------------------|-------------------------------------------------------------------------------------|
| 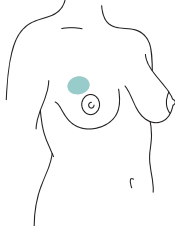 |  |
| <p>Seul le cancer sera retiré (et un peu de tissu sein).</p>                      | <p>Toute la glande mammaire sera retirée.</p>                                       |

.....

.....

.....

## 4. Aurai-je besoin d'une autre opération ?

| Tumorectomie avec radiothérapie                                                                                                                                     | Mastectomie                                                                          |                                                                                       |
|---------------------------------------------------------------------------------------------------------------------------------------------------------------------|--------------------------------------------------------------------------------------|---------------------------------------------------------------------------------------|
| 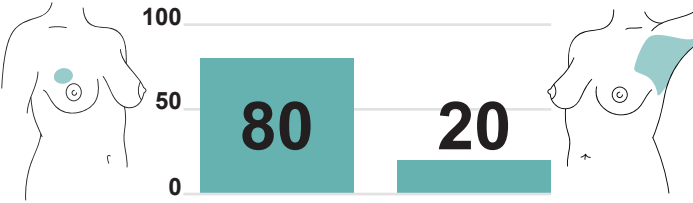 <p>Pas d'autre opération nécessaire      Autre opération nécessaire</p>          |  |  |
| <p>C'est possible. Jusqu'à 20 femmes sur 100 (20%) auront peut-être besoin d'une autre opération pour retirer du tissu mammaire ou des ganglions lymphatiques*.</p> | <p>C'est possible, si vos ganglions lymphatiques sont atteints.</p>                  | <p>Oui, si vous choisissez la reconstruction mammaire*.</p>                           |

.....

.....

.....

\***Ganglion lymphatique** : Petits organes qui assurent la filtration de la lymphe. Ils gonflent en cas d'infection. Les ganglions lymphatiques au creux de l'aisselle pourront être retirés si ils sont cancéreux.

\***Reconstruction mammaire** : Une ou plusieurs opérations pendant lesquelles on reforme le sein enlevé lors de la mastectomie. Le chirurgien utilisera un implant, vos propres tissus ou une combinaison des deux.

# Cancer du sein à un stade précoce : Quel est le bon choix pour moi ?

Utilisez cet outil d'aide à la décision pour vous aider à choisir, avec votre médecin, la meilleure option de traitement pour le cancer du sein à un stade précoce (stades I à IIIA).

## 5. Combien de temps me faudra-t-il pour me rétablir ?

### Tumorectomie avec radiothérapie

La plupart des femmes sont opérées sans hospitalisation et rentrent à la maison le jour même.

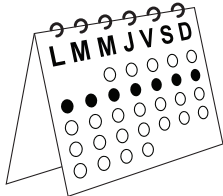

...mais cela peut varier.

Il vous faudra au moins une semaine avant de reprendre vos activités habituelles.

### Mastectomie

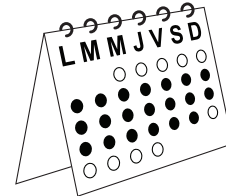

...mais c'est plus long lors d'une reconstruction.

Il faut compter au moins plusieurs semaines avant de reprendre vos activités habituelles.

## 6. Aurai-je besoin de radiothérapie dans le sein ?

### Tumorectomie avec radiothérapie

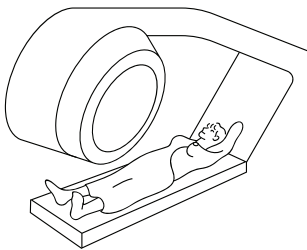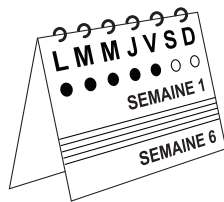

Oui, cela signifie un traitement de quelques minutes, cinq jours par semaine, pendant environ 6 semaines.

### Mastectomie

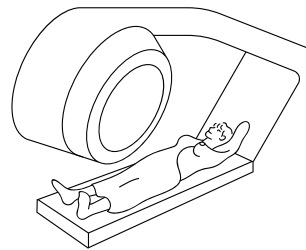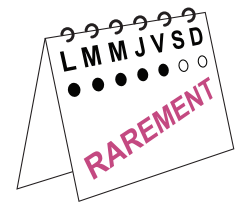

Dans la majorité des cas, la radiothérapie n'est pas nécessaire après une mastectomie.



# Cancer du sein à un stade précoce : Quel est le bon choix pour moi ?

Utilisez cet outil d'aide à la décision pour vous aider à choisir, avec votre médecin, la meilleure option de traitement pour le cancer du sein à un stade précoce (stades I à IIIA).

## 7. Est-ce que mes ganglions lymphatiques seront retirés ?

Tumorectomie avec radiothérapie

Mastectomie

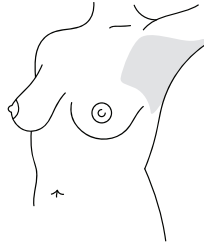

Dans les deux cas, votre médecin privilégiera le retrait du/des ganglions sentinelles\*. Si ils sont atteints, le prélèvement d'autres ganglions pourra être nécessaire.

.....

.....

.....

## 8. Aurai-je besoin de chimiothérapie\* ?

Tumorectomie avec radiothérapie

Mastectomie

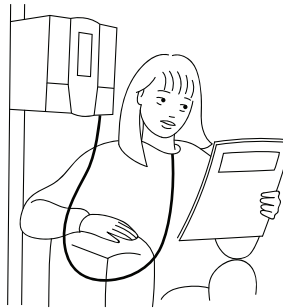

Il se peut qu'on vous propose une chimiothérapie, mais cela ne dépend pas de l'opération choisie. La perte des cheveux est fréquente après la chimiothérapie. Des alternatives (prothèse capillaire\*) vous seront offertes.

.....

.....

.....

\***Ganglion sentinelle** : Ganglion qui est le plus proche de la tumeur. Son analyse permet de savoir si la tumeur a atteint les ganglions et choisir les traitements nécessaires.

\***Chimiothérapie** : Traitement pendant lequel des médicaments puissants vous sont donnés, afin de détruire les cellules cancéreuses. Le plus souvent, le traitement se fait par perfusion (un liquide passe dans le corps par une veine). Les effets secondaires sont fréquents : troubles digestifs, chute des cheveux, fatigue.

\***Prothèse capillaire** : Perruque médicale qui cache la perte de cheveux causée par la chimiothérapie. La perruque permet au cuir chevelu de respirer afin que les cheveux puissent repousser dessous.

**Supplementary file 5: English translation**  
**(single translation by the authors for reviewing purposes only)**

## Early-stage breast cancer: What's right for me?

Use this decision-support tool to help you and your doctor decide how best to treat early-stage breast cancer (stages I to IIIA).

### 1. Will it affect how long I live?

| Lumpectomy* with radiation*                           | Mastectomy* |
|-------------------------------------------------------|-------------|
| No, how long you live is the same for both surgeries. |             |

*Your questions and feelings:* .....

.....

.....

### 2. Can the cancer return to the breast?

| Lumpectomy with radiation                                                                                                                                                   | Mastectomy                                                                                                                                                             |
|-----------------------------------------------------------------------------------------------------------------------------------------------------------------------------|------------------------------------------------------------------------------------------------------------------------------------------------------------------------|
| Within 5 years, cancer returns for <b>about 7 in 100 women (7%)</b> . The risk may be higher or lower, depending on the stage of the cancer and the tumour characteristics. | Within 5 years, cancer returns for <b>about 2 in 100 women (2%)</b> . The risk may be higher or lower depending on the stage of the cancer and tumour characteristics. |

.....

.....

.....

**\*Lumpectomy:** Operation during which the surgeon removes the tumor while preserving the breast. The words tumorectomy, zonectomy and partial mastectomy are also used to refer to the same operation.

**\*Mastectomy:** Operation during which the surgeon removes the breast. The words total mastectomy are also used to refer to the same operation.

**\*Radiation therapy:** Post-operative treatment during which the doctor applies radiation to part or all of the breast.

**3. What is removed from the breast?**

| <b>Lumpectomy with radiation</b>                               | <b>Mastectomy</b>                                 |
|----------------------------------------------------------------|---------------------------------------------------|
| Only the cancer lump will be removed (and some breast tissue). | The whole breast (mammary gland) will be removed. |

.....  
 .....  
 .....

**4. Will I need another operation?**

| <b>Lumpectomy with radiation</b>                                                                                                    | <b>Mastectomy</b>                                                                                            |
|-------------------------------------------------------------------------------------------------------------------------------------|--------------------------------------------------------------------------------------------------------------|
| Possibly, <b>20 in 100 women (20%)</b> might need additional surgery to remove more breast tissue or lymph nodes* that have cancer. | <b>Possibly</b> , if your lymph nodes have cancer.<br><br><b>Yes</b> , if you choose breast reconstruction*. |

.....  
 .....  
 .....

\***Lymph nodes:** Small organs that filter lymph. They swell in the event of infection. Lymph nodes in the armpit can be removed if they are cancerous.

\***Breast reconstruction:** One or more operations during which the breast removed during mastectomy is reshaped. The surgeon will use an implant, your own tissue or a combination of both.

**5. How long will it take for me to recover?**

| <b>Lumpectomy with radiation</b>                                                                | <b>Mastectomy</b>                                                                                                 |
|-------------------------------------------------------------------------------------------------|-------------------------------------------------------------------------------------------------------------------|
| Most women undergo outpatient surgery and go home the same day.                                 |                                                                                                                   |
| ...but this may vary. It will take at least a week before you can resume your usual activities. | ...or longer for reconstruction. It will take at least several weeks before you can resume your usual activities. |

.....

.....

.....

**6. Will I need radiation in the breast?**

| <b>Lumpectomy with radiation</b>                                                       | <b>Mastectomy</b>                                                                   |
|----------------------------------------------------------------------------------------|-------------------------------------------------------------------------------------|
| Yes, this means treatment lasting a few minutes, five days a week, for around 6 weeks. | Radiation is not usually given after a mastectomy but may sometimes be recommended. |

.....

.....

.....

**7. Will my lymph nodes be removed?**

| <b>Lumpectomy with radiation</b>                                                                                                              | <b>Mastectomy</b> |
|-----------------------------------------------------------------------------------------------------------------------------------------------|-------------------|
| In both cases, your doctor will prefer to remove the sentinel lymph node(s)*. If they are affected, other lymph nodes may need to be removed. |                   |

.....  
.....  
.....

**8. Will I need chemotherapy\*?**

| <b>Lumpectomy with radiation</b>                                                                                                                                                    | <b>Mastectomy</b> |
|-------------------------------------------------------------------------------------------------------------------------------------------------------------------------------------|-------------------|
| You may be offered chemotherapy, but this does not depend on the surgery you chose. Hair loss is common after chemotherapy. Alternatives (hair prosthesis*) will be offered to you. |                   |

.....  
.....  
.....

**\*Sentinel node:** The node closest to the tumor. Its analysis enables us to determine whether the tumor has reached the lymph nodes, and to select the necessary treatments.

**\*Chemotherapy:** Treatment during which powerful drugs are given to destroy cancer cells. Treatment is usually by infusion (a liquid is passed through a vein into the body). Side effects are frequent: digestive problems, hair loss, fatigue.

**\*Hair prosthesis:** A medical wig that conceals the hair loss caused by chemotherapy. The wig allows the scalp to breathe so that the hair can grow back underneath.

# Early stage breast cancer: What's right for me?

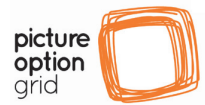

Use this **Picture Option Grid** to help you and your healthcare professional decide how best to treat early stage breast cancer (stages I to IIIA). The last page is for **your notes, thoughts, or any questions** for you to discuss with your doctor.

1. Will it affect how long I live?

Lumpectomy with radiation

Mastectomy

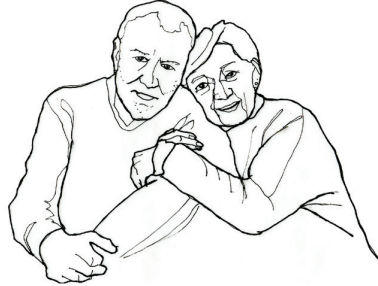

No, how long you live is the same for both surgeries.

2. Will cancer come back in the breast?

Lumpectomy with radiation

Mastectomy

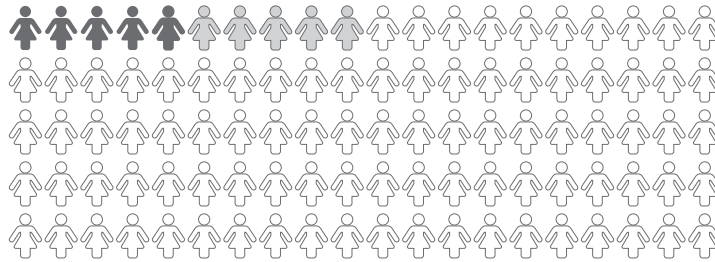

Within 10 years, breast cancer returns for about **5-10 in 100 women (5-10%)**. This depends on the cancer stage and tumor characteristics, rather than on the type of surgery. Please discuss your individual risks with your doctor.

3. What is removed in the breast?

Lumpectomy with radiation

Mastectomy

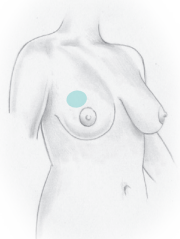

Only the cancer lump will be removed.

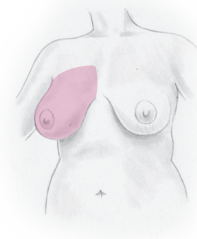

The whole breast will be removed.

#### 4. Will I need more than one surgery?

##### Lumpectomy with radiation

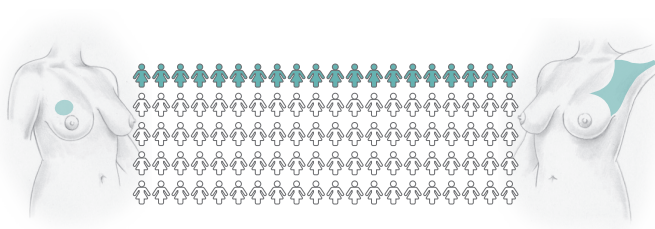

Possibly, **20 in 100 women (20%)** might need additional surgery to remove more breast tissue or lymph nodes that have cancer.

##### Mastectomy

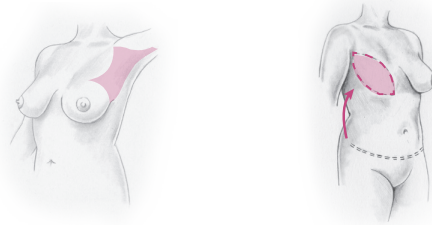

**Possibly**, if your lymph nodes have cancer. **Yes**, if you choose breast reconstruction.

#### 5. How long will it take me to recover?

##### Lumpectomy with radiation

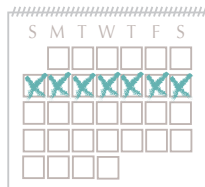

Most women are home on the same day as surgery  
**...but this may vary.**  
It will take about a week, or more, before you can resume usual activities.

##### Mastectomy

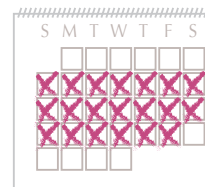

**...or longer with reconstruction.**  
It will take several weeks, or longer, before you can resume usual activities.

#### 6. Will I need radiation in the breast?

##### Lumpectomy with radiation

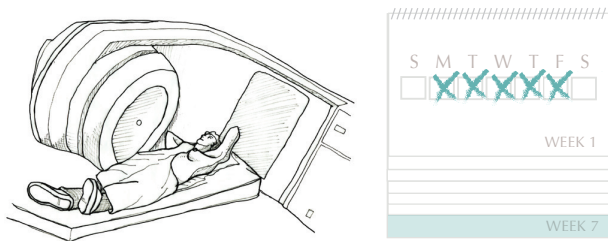

Yes, it will mean visits to the hospital **five days a week**, for up to **seven weeks** after surgery.

##### Mastectomy

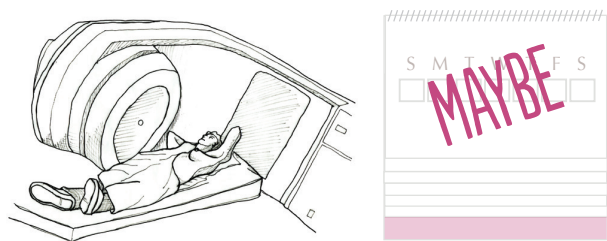

Radiation is **not usually given** after a mastectomy but may **sometimes** be recommended.

### 7. Will my lymph nodes be removed?

Lumpectomy with radiation

Mastectomy

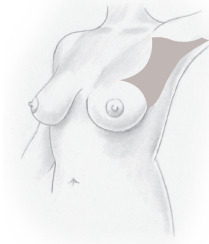

Possibly, if cancer spreads to the lymph nodes under your arm. Your doctor will discuss with you whether you should consider further treatment such as surgery or radiotherapy.

### 8. Will I need chemotherapy and lose my hair?

Lumpectomy with radiation

Mastectomy

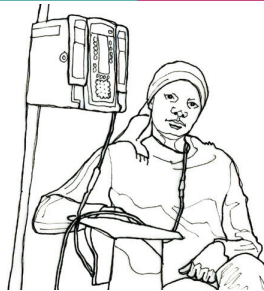

You may be offered chemotherapy, but this does not depend on the surgery you choose. Hair loss is common after chemotherapy.

### 9. How much will it cost?

Lumpectomy with radiation

Mastectomy

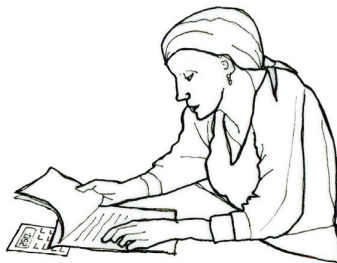

Both options have similar costs.

It is best to know what is covered by your insurance and what your out of pocket costs may be. Don't hesitate to ask your care team about this. They will know who can answer your questions.



## Notes and questions

Now that you have looked at the Picture Option Grid, this page is for your notes, thoughts or any questions for you to discuss with your doctor.

1. Will it affect how long I live?

-----  
-----  
-----

6. Will I need radiation in the breast?

-----  
-----  
-----

2. Will cancer come back in the breast?

-----  
-----  
-----

7. Will my lymph nodes be removed?

-----  
-----  
-----

3. What is removed in the breast?

-----  
-----  
-----

8. Will I need chemotherapy and lose my hair?

-----  
-----  
-----

4. Will I need more than one surgery?

-----  
-----  
-----

9. How much will it cost?

-----  
-----  
-----

5. How long will it take me to recover?

-----  
-----  
-----

Other questions/thoughts:

-----  
-----  
-----

# Reconstruction mammaire\* : quel est le bon choix pour moi ?

Utilisez cet outil d'aide à la décision pour vous aider à choisir, avec votre médecin, la meilleure option de reconstruction mammaire.

## 1. Qu'est-ce que c'est ?

| Aucune reconstruction                                                                                         | Reconstruction avec un implant*                                                                                                    | Reconstruction avec vos propres tissus                                                                                                                                                                                                |
|---------------------------------------------------------------------------------------------------------------|------------------------------------------------------------------------------------------------------------------------------------|---------------------------------------------------------------------------------------------------------------------------------------------------------------------------------------------------------------------------------------|
| 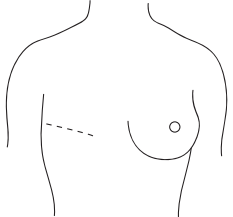                             |                                                  |                                                                                                                                                    |
| <p>La totalité du sein est retirée. Une prothèse en silicone peut être utilisée dans votre soutien-gorge.</p> | <p>La totalité du sein est retirée. On utilisera une prothèse en silicone en 1 temps ou 2 temps avec une expansion des tissus.</p> | <p>La totalité du sein est retirée. Votre propre peau, gras et parfois muscles sont utilisés pour créer un nouveau sein. Ils sont souvent prélevés dans le dos. Un implant sera parfois nécessaire en plus de vos propres tissus.</p> |

## 2. Quelle sera mon apparence après avoir quitté la salle d'opération ?

| Aucune reconstruction                                                              | Reconstruction avec un implant                                                       | Reconstruction avec vos propres tissus                                               |
|------------------------------------------------------------------------------------|--------------------------------------------------------------------------------------|--------------------------------------------------------------------------------------|
| 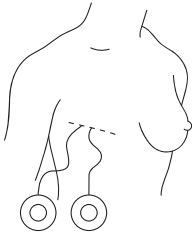 |  |  |
| <p>Votre sein sera plat et vous aurez des drains.</p>                              | <p>Vos aurez un sein plus ou moins complet et des drains.</p>                        | <p>Vous aurez un sein plus ou moins complet et des drains.</p>                       |

.....

.....

\***Reconstruction mammaire** : Une ou plusieurs opérations pendant lesquelles on reconstitue le volume du sein enlevé. Le chirurgien utilisera un implant (prothèse), ou vos tissus mous. \***Implant mammaire** : Prothèse utilisée en chirurgie plastique pour augmenter le volume d'un sein après une mastectomie.

### 3. De combien d'opérations aurai-je besoin ?

| Aucune reconstruction | Reconstruction avec un implant | Reconstruction avec vos propres tissus |
|-----------------------|--------------------------------|----------------------------------------|
| <b>1</b>              | <b><math>\geq 2</math></b>     | <b><math>\geq 2</math></b>             |
| Une opération.        | Au moins deux opérations.      | Au moins deux opérations.              |

### 4. Combien de temps prend la première opération ?

| Aucune reconstruction                                                              | Reconstruction avec un implant                                                      | Reconstruction avec vos propres tissus                                               |
|------------------------------------------------------------------------------------|-------------------------------------------------------------------------------------|--------------------------------------------------------------------------------------|
| 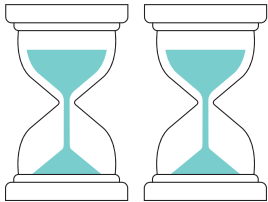 |  |  |
| 1 à 2 heures.                                                                      | 2 à 3 heures.                                                                       | 2 à 4 heures.                                                                        |

.....  
.....

## 5. Combien de temps faut-il pour se rétablir ?

| Aucune reconstruction                                                                              | Reconstruction avec un implant                                                                       | Reconstruction avec vos propres tissus                                                             |
|----------------------------------------------------------------------------------------------------|------------------------------------------------------------------------------------------------------|----------------------------------------------------------------------------------------------------|
| 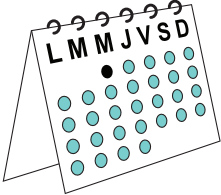                  |                    |                 |
| <p>Vous serez à l'hôpital pendant une journée et pourrez retourner travailler dans 4 semaines.</p> | <p>Vous serez à l'hôpital pendant 1 à 2 jour(s) et pourrez retourner travailler dans 6 semaines.</p> | <p>Vous serez à l'hôpital pendant 3 à 5 jours et pourrez retourner travailler dans 6 semaines.</p> |

## 6. Quels sont les risques liés à la reconstruction ?

| Aucune reconstruction                                                                | Reconstruction avec un implant                                                                                       | Reconstruction avec vos propres tissus                                                                                     |
|--------------------------------------------------------------------------------------|----------------------------------------------------------------------------------------------------------------------|----------------------------------------------------------------------------------------------------------------------------|
| 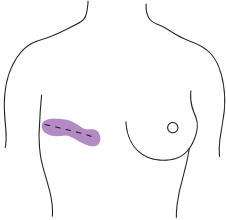 |                                  | <p>Ne s'applique pas.</p>                                                                                                  |
| <p>Ne s'applique pas.</p>                                                            | <p>3 à 12 patients sur 100 (3 à 12%) auront une infection. 1 à 11 patients sur 100 (1 à 11%) auront une nécrose.</p> | <p>La procédure échouera chez 1 à 8 patientes sur 100 (1 à 8%). 3 à 19 patientes sur 100 (3 à 19%) auront une nécrose.</p> |

\***Nécrose**: Souffrance de la peau qui peut conduire à un aspect rose, puis mauve jusqu'à violet ou noir. La cicatrisation est variable.

## 7. Quelle sera la sensation ?

| Aucune reconstruction                                                                       | Reconstruction avec un implant                                                                                                                | Reconstruction avec vos propres tissus                                                                                       |
|---------------------------------------------------------------------------------------------|-----------------------------------------------------------------------------------------------------------------------------------------------|------------------------------------------------------------------------------------------------------------------------------|
| 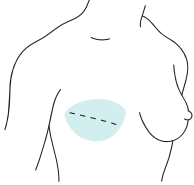           |                                                            |                                           |
| <p>Vous aurez une sensation d'engourdissement. Prothèse dans le soutien-gorge possible.</p> | <p>Vous aurez une sensation d'engourdissement et peut-être des tiraillements. L'apparence sera plus ou moins asymétrique et artificielle.</p> | <p>Vous aurez une sensation d'engourdissement. Le sein sera souple au toucher. L'apparence sera symétrique et naturelle.</p> |

## 8. Puis-je changer d'avis ?

| Aucune reconstruction                                                             | Reconstruction avec un implant                                                      | Reconstruction avec vos propres tissus                                              |
|-----------------------------------------------------------------------------------|-------------------------------------------------------------------------------------|-------------------------------------------------------------------------------------|
|  |  |  |
| <p>Oui. Vous pourrez avoir une reconstruction plus tard.</p>                      | <p>Oui, vous pouvez choisir d'utiliser vos propres tissus plus tard.</p>            | <p>Non.</p>                                                                         |

## 9. Est-ce que le cancer peut revenir dans le sein reconstruit ?

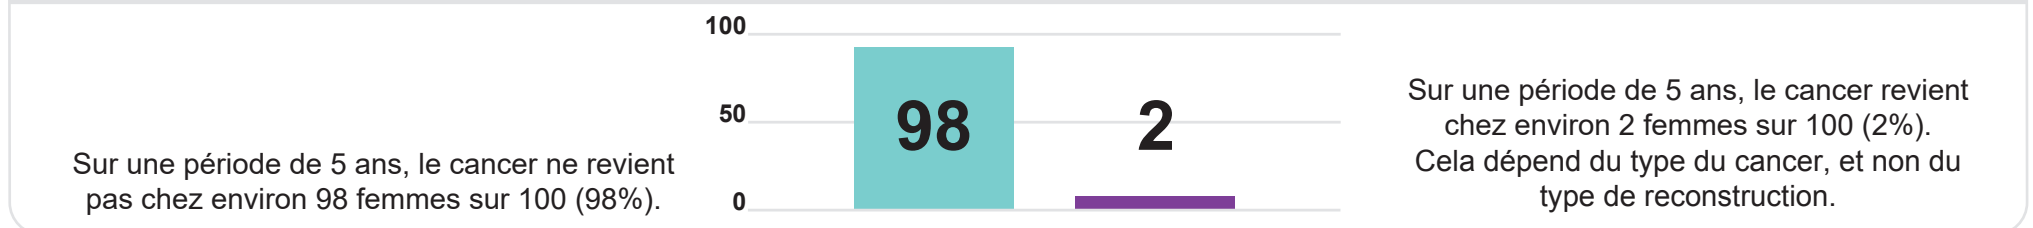

**Supplementary file 6: English translation**  
*(single translation by the authors for reviewing purposes only)*

## Breast reconstruction\*: what's right for me?

Use this decision-making tool to help you and your doctor decide the best option for breast reconstruction.

### 1. What is it?

| No reconstruction                                                      | Reconstruction with an implant*                                                                    | Reconstruction with your own tissue                                                                                                                                                                           |
|------------------------------------------------------------------------|----------------------------------------------------------------------------------------------------|---------------------------------------------------------------------------------------------------------------------------------------------------------------------------------------------------------------|
| The whole breast is removed. A silicone insert can be used in your bra | The whole breast is removed. A silicone prosthesis is used in 1 or 2 stages with tissue expansion. | The whole breast is removed. Your own skin, fat, and sometimes muscle are used to create a new breast. These are often taken from your back. An implant is sometimes required in addition to your own tissue. |

### 2. How will I look after leaving the operating room?

| No reconstruction                            | Reconstruction with an implant                                   | Reconstruction with your own tissue                              |
|----------------------------------------------|------------------------------------------------------------------|------------------------------------------------------------------|
| Your chest will be flat with drainage tubes. | You will have a more or less complete breast and drainage tubes. | You will have a more or less complete breast and drainage tubes. |
|                                              |                                                                  |                                                                  |

.....  
 .....

\***Breast reconstruction:** One or more operations during which the volume of the removed breast is reconstituted. The surgeon will use an implant (prosthesis), or your soft tissues. \***Mammary implant:** A prosthesis used in plastic surgery to increase the volume of a breast after a mastectomy.

**3. How many operations will I need?**

| No reconstruction | Reconstruction with an implant | Reconstruction with your own tissue |
|-------------------|--------------------------------|-------------------------------------|
| One operation.    | At least two operations.       | At least two operations.            |

**4. How long is the first operation?**

| No reconstruction | Reconstruction with an implant | Reconstruction with your own tissue |
|-------------------|--------------------------------|-------------------------------------|
| 1 to 2 hrs.       | 2 to 3 hrs..                   | 2 to 4 hrs.                         |

.....  
.....

**5. How long will it take to recover?**

| No reconstruction                                                        | Reconstruction with an implant                                                 | Reconstruction with your own tissue                                           |
|--------------------------------------------------------------------------|--------------------------------------------------------------------------------|-------------------------------------------------------------------------------|
| You will be in the hospital for 1 day and can return to work in 4 weeks. | You will be in the hospital for 1 to 2 days and can return to work in 6 weeks. | You will be in the hospital for 3 to 5 days and can return to work in 6 weeks |

**6. What are the risks of reconstruction?**

| No reconstruction | Reconstruction with an implant                                                                                                        | Reconstruction with your own tissue                                                                                                                     |
|-------------------|---------------------------------------------------------------------------------------------------------------------------------------|---------------------------------------------------------------------------------------------------------------------------------------------------------|
| Does not apply.   | 3 to 12 out of 100 (3 to 12%) of patients will have an infection.<br>1 to 11 out of 100 (1 to 11%) of patients will have a necrosis*. | 1 to 8 out of 100 patients (1 to 8%) have partial or complete failure of procedure.<br>3 to 19 out of 100 (3 to 19%) of patients will have a necrosis*. |

.....  
 .....

\* **Necrosis:** Suffering of the skin that can lead to a pink, then mauve to purple or black appearance. Healing is variable.



**7. What will it feel like?**

| No reconstruction                                      | Reconstruction with an implant                                                                                                                 | Reconstruction with your own tissue                                                                                           |
|--------------------------------------------------------|------------------------------------------------------------------------------------------------------------------------------------------------|-------------------------------------------------------------------------------------------------------------------------------|
| Your chest will feel numb. Prosthesis in bra possible. | Your breast will feel numb. You may feel tightness in the chest with the implant. Appearance will be more or less asymmetrical and artificial. | Your breast will feel numb. To your touch, the breast will feel very natural. The appearance will be symmetrical and natural. |

**8. Can I change my mind?**

| No reconstruction                         | Reconstruction with an implant                    | Reconstruction with your own tissue |
|-------------------------------------------|---------------------------------------------------|-------------------------------------|
| Yes. You can have a reconstruction later. | Yes, you can decide to use your own tissue later. | No.                                 |

**9. Will cancer come back in the reconstructed breast?**

| No reconstruction                                                                                                                                                                                                                               | Reconstruction with an implant | Reconstruction with your own tissue |
|-------------------------------------------------------------------------------------------------------------------------------------------------------------------------------------------------------------------------------------------------|--------------------------------|-------------------------------------|
| <p>Within 5 years, cancer does not return in approximately 98 out of 100 women (98%). Within 5 years, cancer comes back in about 2 out of 100 women (2%).</p> <p>This depends on your specific cancer, and not on your reconstruction type.</p> |                                |                                     |

.....

.....

# Breast reconstruction: what's right for me?

Use this Picture Option Grid to help you and your health care provider decide the best option for breast reconstruction. The last page is for your notes, thoughts or any questions, for you to discuss with your doctor.

## What is it?

### No reconstruction

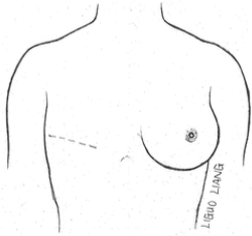

The whole breast is removed. A silicone insert can be used in your bra 6 to 8 weeks after surgery

### Reconstruction with an implant

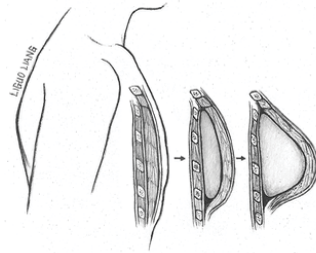

The whole breast is removed. A plastic implant like a balloon is placed under the skin and slowly expanded in the office. It will be replaced by a permanent implant once desired size is reached.

### Reconstruction with your own tissue

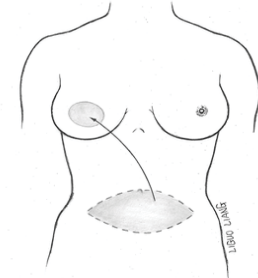

The whole breast is removed, Your own skin, fat, and sometimes muscle are used to create a new breast and are often taken from your belly.

## What will I look like after leaving the operating room?

### No reconstruction

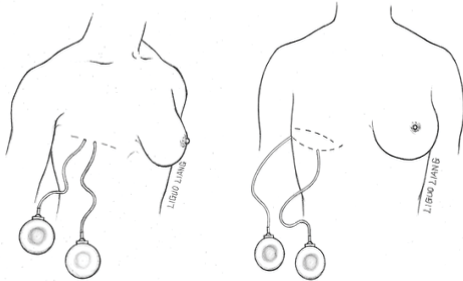

Your chest will be flat with a scar and drainage tubes.

### Reconstruction with an implant

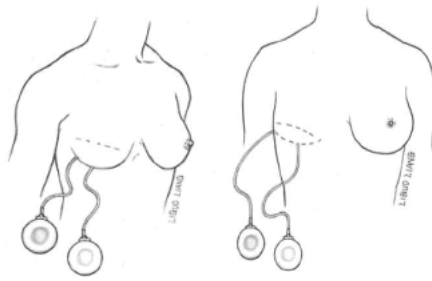

You will have a small breast mound and a scar with drainage tubes.

### Reconstruction with your own tissue

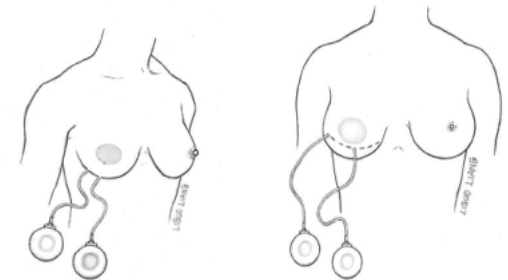

You will have a full breast mound with a round scar and drainage tubes

## How many operations will I need?

No reconstruction

# 1

One

Reconstruction with an implant

# $\geq 2$

Two or more

Reconstruction with your own tissue

# 1-2

One to two. 60 out of 100 patients (60%) undergo a second surgery to make small alterations 3-6 months after the first.

## How long is the first operation?

No reconstruction

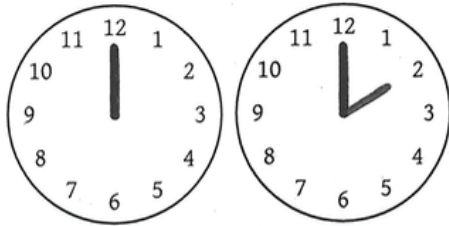

1.5 to 2hrs

Reconstruction with an implant

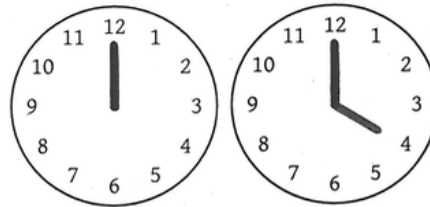

3 to 4hrs

Reconstruction with your own tissue

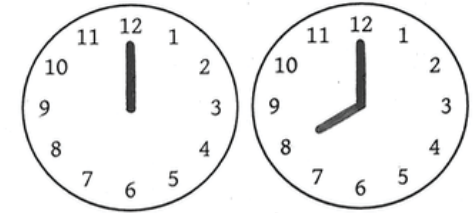

6 to 10hrs

## How long will it take to recover?

No reconstruction

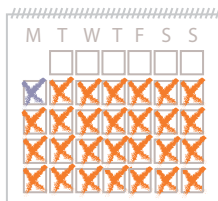

You will be in the hospital for 1 day and can return to work in 4 weeks.

Reconstruction with an implant

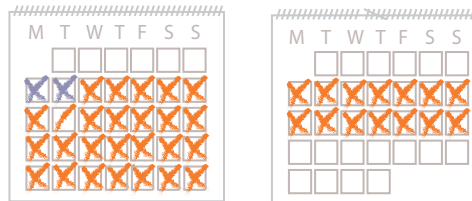

You will be in the hospital for 1 to 2 days and can return to work in 6 weeks.

Reconstruction with your own tissue

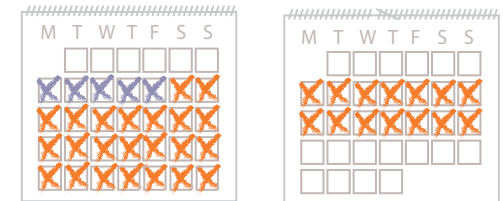

You will be in the hospital for 3 to 5 days and can return to work in 6 weeks.

## What are the risks of reconstruction?

| No Reconstruction | Reconstruction with an implant                                                                                                                                                                                                                                                                                             | Reconstruction with your own tissue                                                                                                                                                                                                                                                                                                                                       |
|-------------------|----------------------------------------------------------------------------------------------------------------------------------------------------------------------------------------------------------------------------------------------------------------------------------------------------------------------------|---------------------------------------------------------------------------------------------------------------------------------------------------------------------------------------------------------------------------------------------------------------------------------------------------------------------------------------------------------------------------|
|                   | 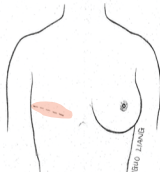                                                                                                                                                                                                                                         |                                                                                                                                                                                                                                                                                        |
| Does not apply    | <ul style="list-style-type: none"> <li>• 3 to 12 out of 100 (3 to 12%) of patients will have an infection.</li> <li>• 13 to 20 out of 100 (13 to 20%) of patients will have necrosis (dark dead skin surrounding the scar) of the skin.</li> <li>• About 25 out of 100 (25%) of patients will have any problem.</li> </ul> | <ul style="list-style-type: none"> <li>• 1 to 3 out of 100 patients (1 to 3%) have partial or complete failure of procedure.</li> <li>• 8 to 14 out of 100 patients (8 to 14%) have hard areas in the breasts.</li> <li>• 3 to 6 out of 100 patients (3 to 6%) have abdominal bulging.</li> <li>• About 44 out of 100 (44%) of patients will have any problem.</li> </ul> |

## What will it feel like?

| No Reconstruction                                                                 | Reconstruction with an implant                                                                                                            | Reconstruction with your own tissue                                                 |
|-----------------------------------------------------------------------------------|-------------------------------------------------------------------------------------------------------------------------------------------|-------------------------------------------------------------------------------------|
| 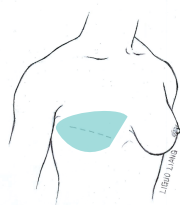 |                                                         |  |
| Your chest will feel numb.                                                        | Your breast will feel numb. You may feel tightness in the chest with the implant. Permanent implant may feel heavier than natural breast. | Your breast will feel numb. To your touch, the breast will feel very natural.       |

## How much does it cost?

| No Reconstruction | Reconstruction with an implant                         | Reconstruction with your own tissue                    |
|-------------------|--------------------------------------------------------|--------------------------------------------------------|
|                   | <h1>\$0</h1>                                           | <h1>\$0</h1>                                           |
| Does not apply    | Insurance covers all aspects of breast reconstruction. | Insurance covers all aspects of breast reconstruction. |

### Can I change my mind?

| No Reconstruction                                                                 | Reconstruction with an implant                                                     | Reconstruction with your own tissue                                                 |
|-----------------------------------------------------------------------------------|------------------------------------------------------------------------------------|-------------------------------------------------------------------------------------|
|  |  |  |
| <p>Yes. You can have a delayed reconstruction years later.</p>                    | <p>Yes, you can decide against reconstruction or use your own tissue later.</p>    | <p>No.</p>                                                                          |

### Will reconstruction delay chemotherapy or radiation?

| No Reconstruction     | Reconstruction with an implant                                                                      | Reconstruction with your own tissue                                                                               |
|-----------------------|-----------------------------------------------------------------------------------------------------|-------------------------------------------------------------------------------------------------------------------|
|                       | 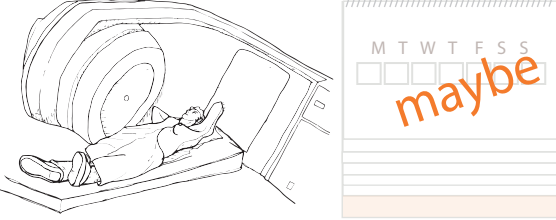                  |                                |
| <p>Does not apply</p> | <p>Possibly, if there are wound healing problems. You must complete expansion before radiation.</p> | <p>Possibly, if there are wound healing problems. Reconstruction can happen after radiation and chemotherapy.</p> |

### Will cancer come back in the reconstructed breast?

| No Reconstruction                                                                   | Reconstruction with an implant                                                       | Reconstruction with your own tissue                                                   |
|-------------------------------------------------------------------------------------|--------------------------------------------------------------------------------------|---------------------------------------------------------------------------------------|
| 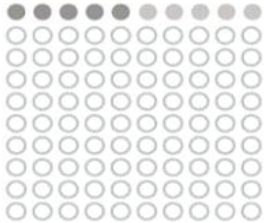 |  |  |

Within 10 years, cancer comes back in about 10-15 in 100 women (5-10%). This depends on your specific cancer, and not on your reconstruction type.
